1 **Climate, crypsis and Gloger's rule in a large family of tropical passerine birds**

2 **(Furnariidae)**

3 Rafael S. Marcondes<sup>1,2,3</sup>, Jonathan A. Nations<sup>1,3</sup>, Glenn F. Seeholzer<sup>1,4</sup> and Robb T. Brumfield<sup>1</sup>

4 1. Louisiana State University Museum of Natural Science and Department of Biological  
5 Sciences. Baton Rouge LA, 70803.

6 2. Corresponding author: rmarco3@lsu.edu

7 3. Joint first authors

8 4. Current address: Department of Ornithology, American Museum of Natural History,  
9 Central Park West at 79th Street, New York, NY, 10024, USA

10

11 Author contributions: RSM and JAN conceived the study, conducted analyses and wrote the  
12 manuscript. RSM and GFS collected data. All authors edited the manuscript. RTB provided  
13 institutional and financial resources.

14 Running head: Climate and habitat type in Gloger's rule

15 Data accessibility statement: Color data is deposited on Dryad under DOI

16 10.5061/dryad.s86434s. Climatic data will be deposited on Dryad upon acceptance for  
17 publication.

18 Key words: Gloger's rule; Bogert's rule; climate; adaptation; light environments; Furnariidae,  
19 coloration; melanin; thermal melanism.

20

21

22

23

24

## 25 **Acknowledgments**

26           This work was partially supported by NSF grant DEB-1146265 to  
27 RTB and by a “Science Without Borders” doctoral fellowship from Brazil’s National Council for  
28 Scientific and Technological Development to RSM (CNPq; 201234/2014–9).

29

30

31

32

33

34

35

36

37

38

39

40

41

42

43

44

45

46

47

48

49 **Abstract**

50 Gloger's rule predicts endothermic animals should have darker colors under warm and  
51 rainy climates, but empirical studies have typically found that animals tend to be darker under  
52 cool and rainy climates. Moreover, Gloger's rule has rarely been tested jointly with the  
53 prediction that animals occupying dark habitats should have darker colors to enhance crypsis.  
54 We aimed to disentangle the effects of climate and light environments (habitat type) as correlates  
55 of plumage brightness in a large Neotropical passerine family. We found that cooler and rainier  
56 climates are associated with darker plumage, even after accounting for habitat types, and that  
57 darker habitats are associated with darker plumage, even after accounting climate. There was an  
58 important interaction between precipitation and temperature, whereby the negative effect of  
59 temperature on brightness becomes stronger under cooler temperatures. Climate and light  
60 environments have separate but complementary effects in driving macroevolutionary patterns of  
61 plumage color variation in birds.

62

63

64

65

66

67

68

69

70

71

72 Ecogeographic rules describe correlations between organismal phenotypes and features  
73 of their environment. Their repeated observation across taxa and space is *prima facie* evidence  
74 that they are driven by common selective pressures (Mayr 1963, James 1991, VanderWerf 2011).  
75 Gloger's rule (Gloger 1833, Rensch 1929) is a longstanding ecogeographic rule describing a  
76 correlation between the colors of mammals and birds and the climatic conditions they occupy.  
77 Recent interpretations of Gloger's rule (Delhey 2019, Marcondes et al. in review) have divided it  
78 into two versions: one "simple" and the other "complex". The simple version relates to variation  
79 in overall melanin content, with greater amounts of melanin making feathers and fur darker  
80 (McGraw et al. 2005). This version of Gloger's rule predicts that animals tend to be darker in  
81 rainy and warm climates and brighter in dry and cool climates (Gloger 1833). The complex  
82 version of Gloger's rule concerns variation specifically in pheomelanin content (Delhey 2019),  
83 with greater amounts of pheomelanin making feathers and fur more brown or reddish-brown  
84 (McGraw et al. 2005). This paper concerns only the simple version of Gloger's rule, which  
85 historically has been the only version most investigators have recognized (Delhey 2019).

86 Gloger's rule has been investigated mostly at the intraspecific level, where evidence is  
87 abundant (Zink and Remsen 1986, Delhey 2019). Well-studied examples of species that have  
88 been found to be darker in more humid climates come from a broad variety of bird clades and  
89 include, but are not limited to, the Barn Owl *Tyto alba* (Roulin and Randin 2015, Romano et al.  
90 2019), Black Sparrowhawk *Accipiter melanoleucos* (Tate and Amar 2017), Song Sparrow  
91 *Melospiza melodia* (Burt and Ichida 2004) and Variable Antshrike *Thamnophilus caerulescens*  
92 (Marcondes et al. in review).

93 In contrast, Gloger's (1833) prediction that animals should be darker in warmer climates  
94 has rarely been supported (Delhey 2019). More often, it has been found that populations  
95 inhabiting warmer climates tend to be lighter than their counterparts from cooler locales, a

96 pattern dubbed Bogert's rule and often attributed to thermoregulatory advantages (Clusella-  
97 Trullas et al. 2007, Rising et al. 2009, Delhey 2019).

98         Mayr (1956) argued that ecogeographic rules typically apply only to variation between  
99 populations within species, but Gloger's rule has also been considered—and widely confirmed—  
100 at the interspecific level. In fact, interspecific comparative analyses are crucial to revealing how  
101 evolutionary processes operating within species can be generalized across macroevolutionary  
102 scales (Meiri 2011, Stoddard et al. 2019). The predicted negative correlation between brightness  
103 and humidity has been supported in phylogenetic comparative studies of the world's primates  
104 (Kamilar and Bradley 2011), a large clade of Holarctic shrews (Stanchak and Santana 2018), the  
105 entire Australian avifauna (Delhey 2018), the world's woodpeckers (Miller et al. 2019), and the  
106 world's passerine birds (Delhey et al. 2019). The latter two studies also supported the prediction  
107 of Bogert's rule that animals are lighter in warmer regions.

108         Beyond climate, another major ecological axis to consider when investigating the causes  
109 of variation in animal color, particularly brightness, is habitat type, or light environment. Endler  
110 (1993) predicted that, to enhance crypsis, animals inhabiting dark light environments (*e.g.* the  
111 interior of dense forests) should be darker than those inhabiting open areas with bright light  
112 conditions (*e.g.*, savannas), a prediction that has received wide support from comparative studies  
113 on birds (McNaught and Owens 2002, Gomez and Thery 2004, Dunn et al. 2015, Maia et al.  
114 2016, Shultz and Burns 2017, Marcondes and Brumfield 2019). Because forests, particularly  
115 tropical rainforests, are more prevalent in rainier climates, this raises the possibility that the  
116 tendency for birds to be darker in more humid places (Gloger's rule) is confounded by a need for  
117 crypsis in darker environments.

118         The passerine family Furnariidae (the woodcreepers, ovenbirds, foliage-gleaners and  
119 allies) is well-suited for investigating the relative roles of climate and light environments in

120 driving interspecific variation in plumage brightness. Throughout the Neotropics, furnariids  
121 occupy virtually every terrestrial biome and habitat type (here construed to mean the spatial  
122 vegetation structure and density typically occupied by each bird species). They are found at the  
123 extremes of both precipitation and temperature in the Neotropics, from the warm and rainy  
124 Amazonian rainforests to warm and arid Chaco savannas, and from cool and dry high-elevation  
125 puna grasslands to the cool and rainy Andean cloud forests (Remsen 2003). Moreover, even  
126 under the same climatic conditions at a single geographic locality, species in this family  
127 specialize in such different habitat types as, for example, the lower strata of tropical rainforests,  
128 the forest canopy, and patches of open vegetation. They therefore experience dramatically  
129 different light environments, from the dim forest understory to intensely sun-lit fields and  
130 savannahs. Despite this ecological diversity, furnariids are virtually all festooned exclusively in  
131 innumerable shades of brown and rufous that vary relatively little in hue, but greatly in  
132 brightness. For example, furnariid colors range from light and creamy brown in the puna- and  
133 desert-inhabiting *Ochetorhynchus* earth-creepers to dark and rich brown in some species of  
134 tropical rainforest-dwelling *Xiphorhynchus* woodcreepers.

135         If Gloger's rule is driven primarily by climate, species inhabiting rainy and warm  
136 climatic regimes are predicted to be darker than those from dry and cool regimes, regardless of  
137 their habitat preference. In contrast, if Gloger's rule is mainly a result of birds adapting to be  
138 darker in darker (forest) habitats, bird species occupying forest habitats are predicted to be darker  
139 than their nonforest-based relatives, even if they inhabit similar climatic regimes. Marcondes and  
140 Brumfield (2019) previously demonstrated that furnariid species have evolved to be darker in  
141 darker habitats, consistent with Endler's (1993) predictions for crypsis. Here, we sought to  
142 investigate the interacting roles of climate and habitat type in driving interspecific variation in  
143 plumage brightness in the Furnariidae.

144

145 **Methods**

146 **Color data**

147 We used the color dataset previously described in Marcondes and Brumfield (2019) and  
148 deposited on the Dryad digital repository under DOI 10.5061/dryad.s86434s (embargoed until  
149 July 16, 2021). Briefly, this dataset includes reflectance data for 250 (84%) furnariid species,  
150 with an average of 6.4 specimens per species (range: 1-8). For each specimen, this dataset  
151 includes reflectance spectra from seven plumage patches divided into a dorsal (crown, back,  
152 rump and tail) and a ventral (belly, breast and belly) set. We calculated plumage brightness  
153 (percentage of reflected white light) and averaged it across all specimens of each species.  
154 Because the Furnariidae are sexually monochromatic with no evidence of cryptic sexual  
155 dichromatism (Remsen 2003; Tobias et al. 2012; Diniz et al. 2016; Marcondes and Brumfield  
156 2019), we considered the sexes together in our analyses. Finally, we used principal component  
157 analysis (PCA) to reduce our dataset to one principal component for the venter and one for the  
158 dorsum. The first principal components of dorsal and ventral PCAs were both loaded in the same  
159 direction by brightness in all plumage patches, thus representing overall brightness of that body  
160 surface; subsequent principal components captured various aspects of contrasts between plumage  
161 patches within each body surface (Marcondes and Brumfield 2019). Our final color dataset thus  
162 consisted of the first principal component score of brightness for each body surface (hereafter,  
163 simply “dorsal brightness” and “ventral brightness”) for each species.

164

165 **Habitat and climatic data**

166 We used Marcondes and Brumfield’s (2019) categorization scheme for habitat types,  
167 which was based on Endler’s (1993) discussion of natural light environments. In brief, each of

168 the 250 furnariid species we analyzed was assigned to one habitat type, in decreasing order of  
169 ambient light intensity: nonforest, intermediate and forest. The forest category includes only  
170 species that occupy the dimly-lit middle and lower strata of rainforests; we assigned canopy and  
171 edge species to the intermediate category because these areas are more intensely illuminated than  
172 the forest interior (Endler 1993, Marcondes and Brumfield 2019).

173 To obtain climatic data for each furnariid species we used the georeferenced locality  
174 records dataset of Seeholzer et al. (2017). This extensively-vetted dataset contains 23,588  
175 occurrence records (average=70.4 records/species) gathered from museum specimens, audio  
176 recordings and observational records. For each locality in this dataset, we obtained mean annual  
177 temperature and mean annual precipitation from the BioClim database (Hijmans et al. 2005) and,  
178 for each species, we took the median of temperature and precipitation across all its occurrence  
179 localities. Because of their different magnitudes and units ( $^{\circ}\text{C}$  for temperature and mm/year for  
180 precipitation), before fitting any statistical models (see below), at this stage we scaled each  
181 climatic variable to have a mean of 0 and a standard deviation of 1.

182

### 183 **Statistical analyses**

184 To test the two hypotheses regarding the effects of climate and habitat on plumage  
185 brightness in the Furnariidae, we fit a series of phylogenetic Bayesian multilevel linear models  
186 using the modeling software Stan (Carpenter et al. 2017) as implemented in the R library *brms*  
187 (Bürkner 2017). All R scripts used for the analyses are available at <https://github.com/jonnations>.  
188 The multilevel model framework allowed us to fit linear models with multiple predictor variables  
189 while including group-level effects that account for statistical non-independence of species data  
190 due to shared phylogenetic history.



191 First, we tested the hypothesis that Gloger's rule is primarily driven by climate, and  
192 species in wetter and warmer localities are darker than those from drier and cooler localities,  
193 regardless of habitat preference (forest, intermediate or nonforest). Under this hypothesis, we  
194 expect that species occupying wet and warm locales will be darker than those from dry and cool  
195 locales even when comparing nonforest species in the former to forest species in the latter. We  
196 fit two identical phylogenetic multivariate linear regression models, one with dorsal brightness as  
197 our response variable (Dorsal Model 1) and the other with ventral brightness as our response  
198 variable (Ventral Model 1). These models use precipitation, temperature, and the interaction  
199 between precipitation and temperature as the predictor variables. We used a species level matrix  
200 of scaled phylogenetic branch lengths (*i.e.*, the phylogenetic correlation matrix; Bürkner 2017)  
201 from the phylogeny of Harvey et al. (in review) as a group-level effect (de Villemereuil et al.  
202 2012) to account for correlations due to phylogenetic relatedness of species. These models test  
203 the Gloger's rule prediction that birds occupying warm and rainy regions should be darker than  
204 those occupying cool and dry regions (Gloger 1833, Rensch 1929). A nonzero, negative effect of  
205 precipitation on brightness would be consistent with Gloger's rule, and a nonzero, positive effect  
206 would contradict it; likewise for the effect of temperature on brightness. Dorsal and Ventral  
207 Models 1 also estimate the interaction parameter of temperature and precipitation, which allows  
208 us to explicitly test whether wetter and warmer habitats result in darker plumage, and drier,  
209 cooler habitats result in brighter plumage. As both the dorsal and ventral brightness data had a  
210 slight positive skew, we used the skew-normal distribution family to describe the response  
211 variable rather than a simple Gaussian distribution. This distribution family estimates an  
212 additional parameter, alpha, which describes the direction and the strength of the skew. We fit  
213 regularizing priors on the group-level effects to prevent MCMC chains from occasionally  
214 searching very large, unreasonable values of model space (Gelman 2006; McElreath 2016). Each

215 of the models included 4 chains run for 10000 generations with 5000 generations of warm-up  
216 and 5000 chains of sampling. We assessed chain convergence using the Gelman-Rubin  
217 diagnostic  $\hat{R}$ , and chain efficiency using effective sample size (ESS).  $\hat{R} < 1.01$  and  $ESS > 500$   
218 represent acceptable convergence and mixing.

219 We also tested the alternative hypothesis that Gloger's rule is related to light  
220 environments regardless of climatic variables. Under this hypothesis, we expect species  
221 occupying forested habitats to be darker than those inhabiting nonforest habitats, even if the  
222 nonforest species are in rainier and warmer climates. Specifically, we separated the effects of  
223 habitat from the effects of climate by fitting a phylogenetic multiple regression linear model with  
224 dorsal brightness (Dorsal Model 2) or ventral brightness (Ventral Model 2) as our response and  
225 temperature, precipitation, and our categorical habitat as predictor variables. As in Dorsal and  
226 Ventral Models 1, we included our phylogenetic correlation matrix as a group level effect.  
227 Dorsal and Ventral Models 2 have three predictor variables, generating three population-level  
228 outcomes: 1) The effect of precipitation on brightness, corrected for the influence of temperature,  
229 habitat, and phylogeny, 2) the effect of temperature on brightness, corrected for precipitation,  
230 habitat, and phylogeny, and 3) a posterior distribution of the mean brightness values of each  
231 habitat conditioned on the phylogenetic relationships, and corrected for the effects of  
232 precipitation and temperature. The estimated mean brightness values can directly address our  
233 question about whether species in darker habitats have darker plumage regardless of their  
234 climatic regimes. For categorical predictors, *brms* assigns a random category (habitat type in our  
235 case) as a dummy variable to use as the intercept value, so we removed the intercept parameter  
236 from the model to directly generate posterior distributions for each habitat. We used these  
237 posterior distributions of the mean brightness for each habitat to determine if species in different  
238 habitats differ in their brightness. To determine if the posterior distributions of the mean

239 brightness for each habitat are different from one another, we calculated the distributions of the  
240 differences of each habitat's brightness estimates, *i.e.* contrasts (nonforest-intermediate,  
241 nonforest-forest, intermediate-forest) (McElreath 2016; Roycroft et al. 2019) using the  
242 *compare\_levels* function in the R library *tidybayes* (Kay 2019). If the 95% credible interval of  
243 these difference distributions does not overlap zero, then we can credibly say that brightness is  
244 different between those habitats. This method of calculating the differences between posterior  
245 distributions is analogous to the “Bayesian T-Test” of Kruschke (2013). As in Model 1, we used  
246 regularizing priors and ran 4 chains of 10,000 generations and checked for convergence with  $\hat{R}$   
247 and ESS.

248         As a null model, we also fit an intercept-only phylogenetic multilevel model for  
249 brightness. This model has no predictor variables and only estimates the intercept of the group  
250 level-effect, in our case the phylogenetic correlation matrix. For each plumage surface (dorsal  
251 and ventral), we performed model comparison of our three models using the difference in  
252 expected log predictive density (ELPD) from the widely applicable information criteria (WAIC,  
253 Wantanabe 2010) using the *waic* function in the R package *loo* (Vehtari et al 2018), which  
254 calculates the ELPD and the standard error of the estimate. WAIC is appropriate for Bayesian  
255 inference with non-Gaussian posterior distributions (Gelman, Hwang, and Vehtari 2013); lower  
256 WAIC values represent greater support for a model. Comparing against the null allowed us to  
257 verify that precipitation, temperature, and habitat improved the predictive ability of our model  
258 rather than phylogeny alone explaining differences in brightness. WAIC also allowed us to  
259 assess whether the climate interaction model or the climate + habitat model was a better  
260 predictor of our brightness data.

261

262         **Results**

263 All of our Bayesian multilevel models properly converged, and all parameters had  $\hat{R} <$   
264 1.01 and ESS > 500. Results of Model 1 for the dorsal plumage showed a strong negative effect  
265 of precipitation on dorsal plumage brightness (Table 1, Figure 1), indicating that as precipitation  
266 increases, plumage gets darker, as predicted by Gloger's rule. Model 1 also showed a strong  
267 positive effect of temperature on dorsal plumage (Table 1, Figure 1), demonstrating that as  
268 temperature increases, dorsal plumage gets brighter, *contra* Gloger's rule but consistent with  
269 Bogert's rule. We also found a positive interaction between precipitation and temperature (Table  
270 1, Figures 1 and 2). This interaction indicates that the negative effect of precipitation on  
271 brightness decreases with increasing temperature. In other words, Gloger's rule is more notable  
272 when comparing species that vary in the amount of precipitation they receive but all occupy  
273 similarly cool environments, rather than when comparing species that vary in precipitation but  
274 which all occupy similarly warm environments.

275 We found similar results for the ventral plumage. Precipitation had a negative effect on  
276 ventral plumage brightness (Table 1, Figure 1). Temperature had an uncertain positive effect on  
277 ventral brightness (95% credible interval overlapping 0), demonstrating that temperature has less  
278 importance on ventral plumage than on dorsal plumage. We found a weak positive effect of the  
279 interaction between precipitation and temperature on the ventral plumage (Table 1, Figures 1 and  
280 2).

281 There was a subtle difference between the venter and the dorsum in effects of the  
282 interaction of precipitation and temperature and brightness (Figure 2). Both plumage surfaces  
283 tended to be darkest for species in cool/rainy climates and brightest in cool/dry climates. But  
284 whereas temperature seemed to have little effect on dorsal brightness in dry climates, ventral  
285 plumages tended to be darker under warm/dry conditions than under cool/dry conditions. In other  
286 words, there is little change in dorsal brightness when comparing species from cool/dry and

287 warm/dry conditions, but ventral brightness is higher (lighter) in species from cool/dry than  
288 warm/dry conditions.

289 Our Dorsal and Ventral Models 2, in which we removed the interaction between  
290 precipitation and temperature and added habitat as a predictor, showed a similar negative effect  
291 of precipitation on both dorsal plumage and ventral plumage (Table 2). We also found positive  
292 effects of temperature on dorsal, and an uncertain effect of temperature on ventral plumage  
293 (Table 2). This model also estimated the posterior distributions of mean plumage brightness for  
294 each habitat, conditioned on phylogenetic effects and the climatic variables (Figure 3). We then  
295 calculated the differences of those distributions (Figure 3). For the dorsal plumage we found that  
296 intermediate and nonforest species are credibly brighter than forest species but not  
297 distinguishable from each other, because the difference in their posterior distributions overlapped  
298 zero (Figure 3). Results were similar for ventral plumage, except that the difference between  
299 intermediate and forest species slightly overlapped zero. Therefore, we found that birds in forest  
300 habitats are darker than birds from intermediate or nonforest habitats, even after accounting for  
301 differences in temperature and precipitation.

302 We used the ELPD scores of the WAIC analysis to compare Models 1 and 2 to the null.  
303 We found that both predicted dorsal plumage brightness better than the null model (Table 3).  
304 However, the standard error of the ELPD scores of Models 1 and 2 overlapped, so that we are  
305 unable to conclude which of these two models better predicted dorsal plumage brightness. For  
306 the ventral plumage, Models 1 and 2 also better predicted ventral brightness than the null model,  
307 but in this case Model 2, which included habitat, was a better predictor of ventral plumage  
308 brightness than Model 1, which did not include habitat.

309

310 **Discussion**

311 Gloger's rule is a longstanding ecogeographic principle predicting that birds and  
312 mammals that inhabit rainier and warmer climates tend to have darker plumage and pelage color  
313 than their counterparts (intra- as well as interspecific) from drier and cooler places (Gloger 1833,  
314 Rensch 1929, Mayr 1942, 1963, Delhey 2017, 2019). Here, we found strong support in the  
315 Furnariidae for the predicted relationship between brightness and precipitation. In contrast, we  
316 found that furnariid species tended to be darker in cooler climates, contrary to the second  
317 prediction of Gloger's rule, but consistent with a pattern dubbed Bogert's rule or thermal  
318 melanism, which is often observed in ectothermic animals (Clusella-Trullas et al. 2018). We also  
319 found a credible positive interaction between precipitation and brightness, meaning that the  
320 negative relationship between precipitation and plumage brightness becomes stronger in cooler  
321 climates (Figures 1 and 2). Finally, forest-based lineages tended to have darker plumage than  
322 nonforest-based lineages (Figure 3), consistent with a previous study on furnariids and other  
323 closely-related families (Marcondes and Brumfield 2019). But, here, we expanded on that  
324 previous finding by showing that that tendency for birds to have darker plumage in darker  
325 habitats persists even after accounting for the effects of climate. This indicates that climate and  
326 light environments have separate but complementary effects in driving macroevolutionary  
327 patterns of plumage color variation in birds.

328

### 329 **Gloger's rule, precipitation and temperature**

330 Gloger (1833) wrote that "melanins [...] increase with higher temperature and humidity"  
331 (translation from the German from Delhey 2019), implicating both climatic variables in the rule  
332 that would become his namesake. But Rensch (1936), in the first major discussion of Gloger's  
333 rule in English, downplayed the role of temperature, placing more importance on humidity  
334 (reviewed by Delhey 2019).

335           The test of time—and of modern quantitative techniques—have validated Rensch’s  
336 (1936) emphasis on humidity. Intra- (e.g., Rising et al. 2009, Amar et al. 2014, Marcondes et al.  
337 in review) and interspecific (e.g., Delhey 2018, Delhey et al. 2019) comparisons, including this  
338 study, have consistently failed to find support for a tendency for birds to be darker in warmer  
339 places. Our Models 1 and 2 showed a positive effect of temperature on brightness, particularly in  
340 rainy climates (see below). This is diametrically opposite to Gloger’s (1833) formulation, but in  
341 accordance with intraspecific findings in the Black Sparrowhawk *Accipiter melanogaster* (Amar  
342 et al. 2014), Savannah Sparrow *Passerculus sandwichensis* (Rising et al. 2009) and Variable  
343 Antshrike *Thamnophilus caerulescens* (Marcondes et al. in review), as well as comparative  
344 results from analyses of the Australian avifauna (Delhey 2018) and the world’s passerines  
345 (Delhey et al. 2019). These findings are consistent with Bogert’s rule, a lesser known  
346 ecogeographical rule usually considered to apply only to ectothermic animals (Clusella-Trullas et  
347 al. 2018, Delhey 2018, 2019). This rule predicts animals should be darker in cooler climates to  
348 enhance thermoregulation. The consistency of results showing the same pattern in birds suggests  
349 that Bogert’s rule may be applicable to endothermic animals as well, although we lack an  
350 understanding of its mechanistic underpinnings in that case. Experimental work would be better  
351 suited to advance our knowledge in that regard (Delhey 2018).

352           Our models showed a strong interaction between precipitation and temperature (Figures 1  
353 and 2). In cooler temperatures, the correlation between greater precipitation and lower brightness  
354 was stronger than in warmer temperatures. For illustration, consider four species of furnariids,  
355 each occupying a different climatic regime (Figure 2): the Peruvian Recurvebill *Syndactyla*  
356 *ucayalae* (warm/rainy), the Necklaced Spinetail *Synallaxis stictothorax* (warm/dry), the Itatiaia  
357 Spinetail *Asthenes moreirae* (cool/rainy), and the Cream-rumped Miner *Geositta isabellina*  
358 (cool/dry). Our results suggest that the two species inhabiting dry climates are expected to be

359 brighter than the two species inhabiting rainy climates. But the difference in brightness between  
360 the species inhabiting a cool/dry and a cool/rainy climate should be greater than the difference in  
361 brightness between the species inhabiting a warm/dry and a warm/rainy climate. This is indeed  
362 what our data show. The difference in the first principal component of dorsal brightness between  
363 *Geositta isabellina* (cool/dry) and *Asthenes moreirae* (cool/rainy) was 0.3328, whereas the  
364 difference in the first principal component of dorsal brightness between *Synallaxis stictothorax*  
365 (warm/dry) and *Syndactyla ucayalae* (warm/rainy) was 0.1544.

366         These results can be contrasted with those of Delhey et al. (2019), who, like us, found  
367 support for Gloger's rule for precipitation and Bogert's rule for temperature across the world's  
368 passerines, but did not test for their interaction. Delhey et al. (2019) proposed a general  
369 framework whereby the effect of temperature on plumage brightness has a quadratic shape, with  
370 birds being brighter at low and high temperatures and darker in intermediate temperatures, given  
371 the same levels of precipitation. Due to the credible interaction effect we found, our results do  
372 not conform to that framework. Instead, they suggest a more nuanced scenario: birds are lighter  
373 in cool and dry climates, especially for the ventral plumage, but in cool and rainier climates the  
374 effect of precipitation becomes more prevalent, leading to darker plumage (Figure 2). The  
375 difference between ours and Delhey et al.'s (2019) conclusions highlights how findings at a more  
376 broadly inclusive level (all passerines) may not be directly translatable to a more restricted clade  
377 (Furnariidae). This may be because the furnariids include proportionally fewer species occupying  
378 very cold climates relative to the passerines as a whole. The minimum temperature in our dataset  
379 was 1.7°C, whereas in Delhey et al.'s dataset it was lower than -10°C. Those species from very  
380 cold climates, which are also usually dry climates, could be driving the results observed when  
381 considering all passerines.

382



### 383 **Gloger's rule, precipitation and habitat type**

384 Numerous studies have shown that bird species of dark light environments (*e.g.* forests)  
385 tend to be darker than their relatives from open habitats, a pattern attributed to natural selection  
386 for crypsis (Endler 1993, McNaught and Owens 2002, Gomez and Thery 2004, Dunn et al. 2015,  
387 Maia et al. 2016, Shultz and Burns 2017, Marcondes and Brumfield 2019), but these studies have  
388 been conducted largely separately from investigations of Gloger's rule (*e.g.*, Delhey 2018,  
389 Delhey et al. 2019). We used a model with temperature, precipitation and habitat type as  
390 predictors of brightness to calculate contrasts between the posterior distributions of the  
391 phylogenetic mean of brightness in each habitat, while controlling for differences in the climatic  
392 variables. These contrasts showed that species from bright light environments (nonforest) are  
393 credibly brighter, ventrally, than those from intermediate light environments (forest edge and  
394 canopy), followed by species occupying the forest interior (Figure 3). Results were similar for  
395 the dorsal plumage, except that there was no difference between nonforest and intermediate  
396 habitats (Figure 3).

397 Zink and Remsen (1986) suggested background matching as the main adaptive  
398 mechanism responsible for Gloger's rule. The aforementioned comparative work and our results  
399 corroborate this. Birds tend to be darker in darker (forested) habitats. Because forest habitats also  
400 tend to receive more precipitation (for example, precipitation in our dataset, mean±sd: forest  
401 species, 2009±611 mm/year; intermediate habitat, 1597±700 mm/year; nonforest 852±631  
402 mm/year), the correlation between brightness and habitat could be spuriously driven by climate.  
403 Our results show that is not the case. The difference in brightness across habitats persists even  
404 after controlling for climatic variables, demonstrating that they have separate effects on the  
405 evolution of plumage brightness.

406 Zink and Remsen (1986) also suggested that “humidity per se presumably has little direct  
407 influence”. Because our Model 2 showed negative correlations between brightness and  
408 precipitation, even while including habitat as a predictor, we disagree. Higher precipitation, by  
409 itself, does correlate with darker birds. A potential explanation for this is protection against  
410 feather-degrading bacteria. It is well-documented that increased melanization makes feathers  
411 more resistant to feather-degrading bacteria (Goldstein et al. 2004, Gunderson et al. 2008), and  
412 that these bacteria are common on plumages of wild birds (Burt and Ichida 1999, 2004, Kent  
413 and Burt 2016). However, before it can be conclusively said that feather-degrading bacteria  
414 drive increased pigmentation in birds living in rainier habitats, evidence is needed that these  
415 bacteria are in fact more abundant in more rainy habitats.

416

#### 417 **Gloger’s rule and vegetation density**

418 Delhey (2018) used remote sensing data to show that, in Australia, birds tend to be darker  
419 in more heavily-vegetated areas. This is similar to, and consistent with, our findings. But our  
420 analyses based on habitat preference offer further insight, because bird species occupy habitat  
421 types differentially even within the same locality, a pattern that cannot be captured by remote  
422 sensing-based metrics of vegetation cover. For example, at a typically used resolution, remote  
423 sensing data may show that a 30 m x 30 m cell is covered in very dense, tall vegetation  
424 (rainforest). But different species of furnariids occupying that cell may experience diverse light  
425 environments. For example, in western Amazonia that cell may be occupied by the Orange-  
426 fronted Plushcrown *Metopothrix aurantiaca* in the intensely sun-lit forest canopy and the  
427 Tawny-throated Leaf-tosser *Sclerurus mexicanus* in undergrowth vegetation near the forest floor  
428 in the dim forest interior.

429 Remote sensing analyses may also be complicated by the fact they are often based on  
430 museum specimens collected up to a few decades ago, before recent intense anthropogenic  
431 landscape change that will be reflected in remote sensing data. The landscape where a bird was  
432 collected many years ago may have little resemblance to the landscape at the same locality today.

433 Nevertheless, vegetation density by itself might also favor increased pigmentation,  
434 because greater melanin content makes feathers harder and more resistant to abrasion  
435 (Barrowclough and Sibley 1980, Burt 1986, Bonser 1995). This is often considered in the  
436 context of abrasion from airborne particles, but it is conceivable that abrasion from vegetation  
437 might also be an important selective factor favoring heavier plumage pigmentation (Kale 1966,  
438 Burt 1986, Surmacki et al. 2011, Kroodsma and Verner 2013), although this demands further  
439 empirical study.

440

#### 441 **Conclusion**

442 Gloger's rule is a classic ecogeographic principle predicting animals should be darker in  
443 wetter and warmer regions. We have shown, based on comparative analyses of the Furnariidae, a  
444 family of >200 Neotropical passerine species, that the prediction related to precipitation is borne  
445 out in our data, but the prediction related to temperature is not. In fact, we found that furnariids  
446 tend to be darker in cooler regions. We also found a previously undescribed credible interaction  
447 of precipitation and temperature, whereby the negative effect of precipitation on plumage  
448 brightness becomes stronger under cool temperatures. Furthermore, we also showed that species  
449 in this family tend to be darker in darker light environments and that this effect persists even  
450 after controlling for the effects of climate.

451 Based on ours and previous results, we suggest that the pattern encapsulated by Gloger's  
452 rule is produced by a combination of the partially correlated effects of habitat type, precipitation,

453 and vegetation density. The effect of habitat type is driven by natural selection for enhanced  
454 crypsis in darker light environments (Zink and Remsen 1986, Endler 1993, McNaught and  
455 Owens 2002, Gomez and Thery 2004, Dunn et al. 2015, Maia et al. 2016, Shultz and Burns  
456 2017, Marcondes and Brumfield 2019), whereas the effect of precipitation may be due to feather-  
457 degrading bacteria (Burt and Ichida 1999, 2004, Goldstein et al. 2004, Gunderson et al. 2008,  
458 Kent and Burt 2016), and the effect of vegetation density may be related to feather abrasion  
459 (Kale 1966, Burt 1986, Surmacki et al. 2011, Kroodsmas and Verner 2013), though the latter two  
460 effects still demand further empirical work to be conclusively demonstrated. It is also still  
461 unclear how the effects of temperature fit into this scenario.

462

#### 463 **References cited**

464 Amar, A., Koeslag, A., Malan, G., Brown, M. & Wreford, E. (2014). Clinal variation in  
465 the morph ratio of Black Sparrowhawks *Accipiter melanoleucus* in South Africa and its  
466 correlation with environmental variables. *Ibis*, 156, 627–638.

467 Barrowclough, G.F. & Sibley, F.C. (1980). Feather Pigmentation and Abrasion: Test of a  
468 Hypothesis. *Auk*, 97, 881–883.

469 Bürkner, P.- C. (2017). brms: An R Package for Bayesian Multilevel Models Using Stan.  
470 *Journal of Statistical Software*, 80.

471 Burt, E.H. (1986). An Analysis of Physical, Physiological, and Optical Aspects of Avian  
472 Coloration with Emphasis on Wood-Warblers. *Ornithological Monographs*, iii–126.

473 Burt, E.H. & Ichida, J.M. (1999). Occurrence of Feather-Degrading Bacilli in the  
474 Plumage of Birds. *Auk*, 116, 364–372.

475 Burt, E.H. & Ichida, J.M. (2004). Gloger’s Rule, Feather-Degrading Bacteria, and Color  
476 Variation Among Song Sparrows. *Condor*, 106, 681–686.

477 Carpenter, B., Gelman, A., Hoffman, M.D., Lee, D., Goodrich, B., Betancourt, M. et al.  
478 (2017). Stan: A Probabilistic Programming Language. *Journal of Statistical Software*, 76.

479 Clusella Trullas, S., van Wyk, J.H. & Spotila, J.R. (2007). Thermal melanism in  
480 ectotherms. *J. Therm. Biol.*, 32, 235–245.

481 de Villemereuil, P., Wells, J.A., Edwards, R.D. & Blomberg, S.P. (2012). Bayesian  
482 models for comparative analysis integrating phylogenetic uncertainty. *BMC Evolutionary*  
483 *Biology*, 12, 1-16.

484 Delhey, K. (2017). Gloger’s rule. *Curr. Biol.*, 27, R689–R691.

485 Delhey, K. (2018). Darker where cold and wet: Australian birds follow their own version  
486 of Gloger’s rule. *Ecography*, 41, 673–683.

487 Delhey, K. (2019). A review of Gloger’s rule, an ecogeographical rule of colour:  
488 definitions, interpretations and evidence. *Biol. Rev. Camb. Philos. Soc.*, 94, 1294–1316.

489 Delhey, K., Dale, J., Valcu, M. & Kempnaers, B. (2019). Reconciling ecogeographical  
490 rules: rainfall and temperature predict global colour variation in the largest bird radiation. *Ecol.*  
491 *Lett.*, 22, 726–736.

492 Diniz, P., Ribeiro, P.H.L., Rech, G.S. & Macedo, R.H. (2016). Monochromatism, cryptic  
493 sexual dimorphism and lack of assortative mating in the Rufous Hornero, *Furnarius rufus*  
494 *albogularis*. *Emu*, 116, 294–300.

495 Dunn, P.O., Armenta, J.K. & Whittingham, L.A. (2015). Natural and sexual selection act  
496 on different axes of variation in avian plumage color. *Sci Adv*, 1, e1400155.

497 Endler, J.A. (1993). The Color of Light in Forests and Its Implications. *Ecol. Monogr.*,  
498 63, 1–27.

499 Gelman, A. (2006). Prior distributions for variance parameters in hierarchical models.  
500 *Bayesian Analysis*, 1, 515-533.

501 Gelman, A., Hwang, J. & Vehtari, A. (2014). Understanding predictive information  
502 criteria for Bayesian models. *Statistics and computing*, 24, 997-1016.

503 Goldstein, G., Flory, K.R., Browne, B.A., Majid, S. & Ichida, J.M. (2004). Bacterial  
504 degradation of black and white feathers. *Auk*, 121, 656–659.

505 Gomez, D. & Théry, M. (2004). Influence of ambient light on the evolution of colour  
506 signals: comparative analysis of a Neotropical rainforest bird community. *Ecol. Lett.*, 7, 279–  
507 284.

508 Gunderson, A.R., Frame, A.M., Swaddle, J.P. & Forsyth, M.H. (2008). Resistance of  
509 melanized feathers to bacterial degradation: is it really so black and white? *J. Avian Biol.*, 39,  
510 539–545.

511 Hijmans, R.J., Cameron, S.E., Parra, J.L., Jones, P.G. & Jarvis, A. (2005). Very high  
512 resolution interpolated climate surfaces for global land areas. *Int. J. Climatol.*, 25, 1965–1978.

513 James, F.C. (1991). Complementary Descriptive and Experimental Studies of Clinal  
514 Variation in Birds. *Integr. Comp. Biol.*, 31, 694–706.

515 Kale, H.W. (1966). Plumages and molts in the Long-billed Marsh Wren. *Auk*, 83, 140–  
516 141.

517 Kamilar, J.M. & Bradley, B.J. (2011). Interspecific variation in primate coat colour  
518 supports Gloger’s rule. *J. Biogeogr.*, 38, 2270–2277.

519 Kay, M. (2018). tidybayes: Tidy data and geoms for Bayesian models. R package version  
520 1.

521 Kent, C.M. & Burt, E.H., Jr. (2016). Feather-degrading bacilli in the plumage of wild  
522 birds: prevalence and relation to feather wear. *Auk*, 133, 583–592.

- 523 Kroodsma, D. E. and J. Verner (2013). Marsh Wren (*Cistothorus palustris*), version 2.0.  
524 In: The Birds of North America (A. F. Poole, Editor). Cornell Lab of Ornithology, Ithaca, NY,  
525 USA. <https://doi.org/10.2173/bna.308>
- 526 Kruschke, J.K. (2013). Bayesian estimation supersedes the t test. *Journal of Experimental*  
527 *Psychology: General*, 142, 573.
- 528 Gloger, C.W. (1833). *Das Abändern der Vögel durch Einfluss des Klima's*. August  
529 Shultz, Breslau.
- 530 Maia, R., Rubenstein, D.R. & Shawkey, M.D. (2016). Selection, constraint, and the  
531 evolution of coloration in African starlings. *Evolution*, 70, 1064–1079.
- 532 Marcondes, R.S. & Brumfield, R.T. (2019). Fifty shades of brown: Macroevolution of  
533 plumage brightness in the Furnariida, a large clade of drab Neotropical passerines. *Evolution*, 73,  
534 704–719.
- 535 Mayr, E. (1956). Geographical Character Gradients and Climatic Adaptation. *Evolution*,  
536 10, 105-108.
- 537 Mayr, E. (1963). *Animal species and evolution*. Harvard University Press.
- 538 McElreath, R. (2016). *Statistical Rethinking*. 1st edn. Taylor & Francis Group, Boca  
539 Raton, Florida, USA.
- 540 McGraw, K.J., Safran, R.J. & Wakamatsu, K. (2005). How feather colour reflects its  
541 melanin content. *Funct. Ecol.*, 19, 816–821.
- 542 McNaught, M.K. & Owens, I.P.F. (2002). Interspecific variation in plumage colour  
543 among birds: species recognition or light environment? *J. Evol. Biol.*, 15, 505–514.
- 544 Meiri, S. (2011). Bergmann's Rule--what's in a name? *Glob. Ecol. Biogeogr.*, 20, 203–  
545 207.

- 546 Miller, E.T., Leighton, G.M., Freeman, B.G., Lees, A.C. & Ligon, R.A. (2019).  
547 Ecological and geographical overlap drive plumage evolution and mimicry in woodpeckers. *Nat.*  
548 *Commun.*, 10, 1602.
- 549 Remsen, J. V. (2003). Family Furnariidae (ovenbirds). Pp. 162–357 in J. del Hoyo, A.  
550 Elliott, and D. A. Christie, eds. *Handbook of the birds of the world*. Vol. 8. Lynx Edicions,  
551 Barcelona, Spain.
- 552 Rensch, B. (1929). *Prinzip geographischer rassenkreise und das problem der artbildung*.  
553 Gebrüder Borntraeger, Berlin.
- 554 Rising, J.D., Jackson, D.A. & Fokidis, H.B. (2009). Geographic Variation in Plumage  
555 Pattern and Coloration of Savannah Sparrows. *Wilson J. Ornithol.*, 121, 253–264.
- 556 Romano, A., Séchaud, R., Hirzel, A.H. & Roulin, A. (2019). Climate-driven convergent  
557 evolution of plumage colour in a cosmopolitan bird. *Glob. Ecol. Biogeogr.*, 28, 496–507.
- 558 Roulin, A. & Randin, C. (2015). Gloger’s rule in North American barn owls. *Auk*, 132,  
559 321–332.
- 560 Roycroft, E.J., Nations, J.A. & Rowe, K.C. (2019). Environment predicts repeated body  
561 size shifts in a recent radiation of Australian mammals. *Evolution*, 74, 671–680.
- 562 Seeholzer, G.F., Claramunt, S. & Brumfield, R.T. (2017). Niche evolution and  
563 diversification in a Neotropical radiation of birds (Aves: Furnariidae). *Evolution*, 71, 702–715.
- 564 Shultz, A.J. & Burns, K.J. (2017). The role of sexual and natural selection in shaping  
565 patterns of sexual dichromatism in the largest family of songbirds (Aves: Thraupidae).  
566 *Evolution*, 71, 1061–1074.
- 567 Stanchak, K.E. & Santana, S.E. (2019). Do ecogeographical rules explain morphological  
568 variation in a diverse, Holarctic genus of small mammals? *J. Biogeogr.*, 46, 110–122.



569 Stoddard, M.C., Sheard, C., Akkaynak, D., Yong, E.H., Mahadevan, L. & Tobias, J.A.  
570 (2019). Evolution of avian egg shape: underlying mechanisms and the importance of taxonomic  
571 scale. *Ibis*, 161, 922–925.

572 Surmacki, A., Liu, M., Mercadante, A. & Hill, G.E. (2011). Effect of feather abrasion on  
573 structural coloration in male eastern bluebirds *Sialia sialis*. *J. Avian Biol.*, 42, 514–521.

574 Tate, G.J. & Amar, A. (2017). Morph specific foraging behavior by a polymorphic raptor  
575 under variable light conditions. *Scientific Reports* 7, 9616.

576 Tobias, J.A., Brawn, J.D., Brumfield, R., Derryberry, E.P., Kirschel, A.N.G. & Seddon,  
577 N. (2012). The importance of suboscine birds as study systems in ecology and evolution. *Ornitol.*  
578 *Neotrop.*, 23, 261–274.

579 VanderWerf, E.A. (2012). Ecogeographic patterns of morphological variation in elepaio  
580 (*Chasiempis* spp.): Bergmann's, Allen's, and Gloger's rules in a microcosm. *Ornithol. Monogr.*,  
581 73, 1–34.

582 Vehtari, A., Gelman, A. & Gabry, J. (2018). loo: Efficient leave-one-out cross-validation  
583 and WAIC for Bayesian models. R package version, 2, 1003.

584 Zink, R.M. & Remsen, J.V., Jr. (1986). Evolutionary processes and patterns of  
585 geographic variation in birds. In: *Current Ornithology* (Ed. Johnston, R. F.) 4, 1–69  
586  
587  
588  
589  
590

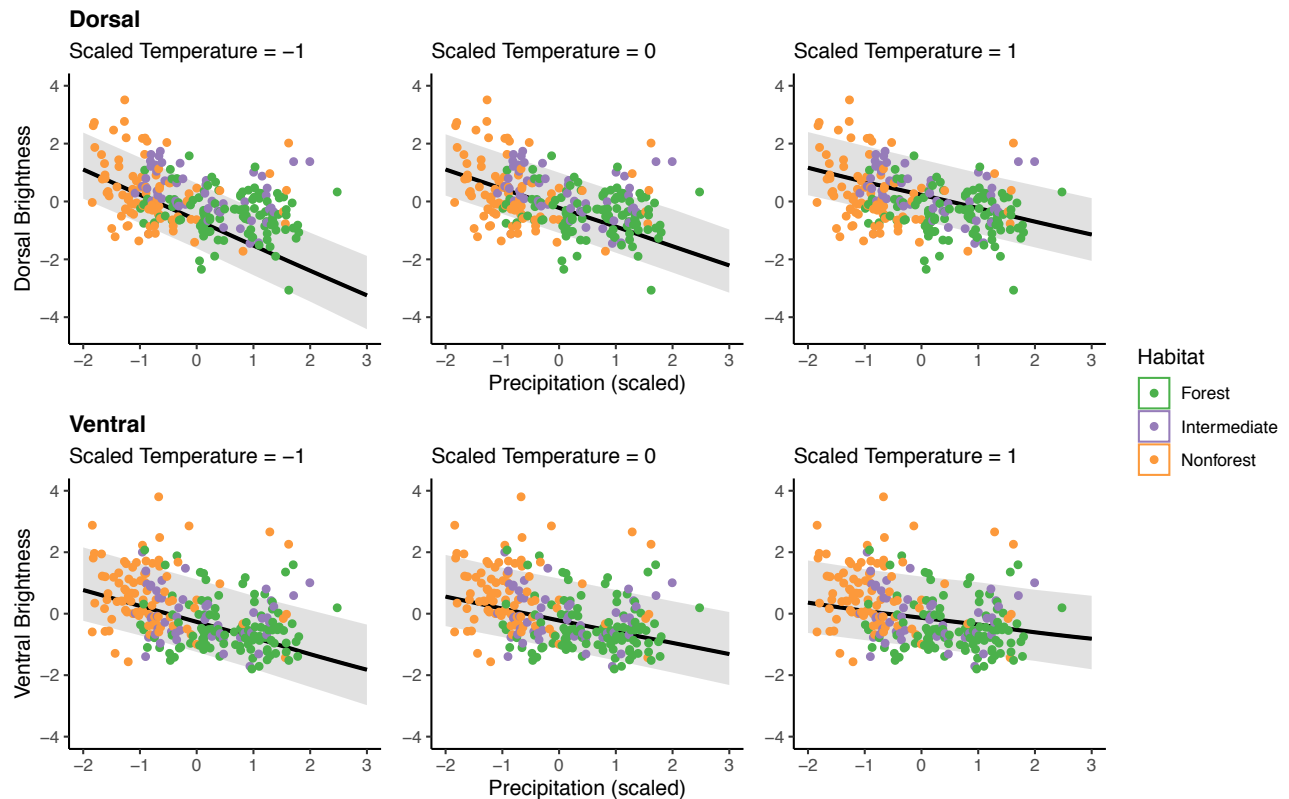

591

592

593

594

595 Figure 1. The slope of the negative relationship between temperature and brightness increases as

596 temperature decreases (from Model 1). Plots in the left-hand column show the effect of

597 precipitation on brightness when scaled temperature is -1 (mean - 1 standard deviation); the

598 middle column shows the effect of precipitation on brightness when scaled temperature is zero

599 (the mean), and the right-hand column shows the effect of precipitation on brightness when

600 scaled temperature is 1 (mean + 1 SD).

601

602

603

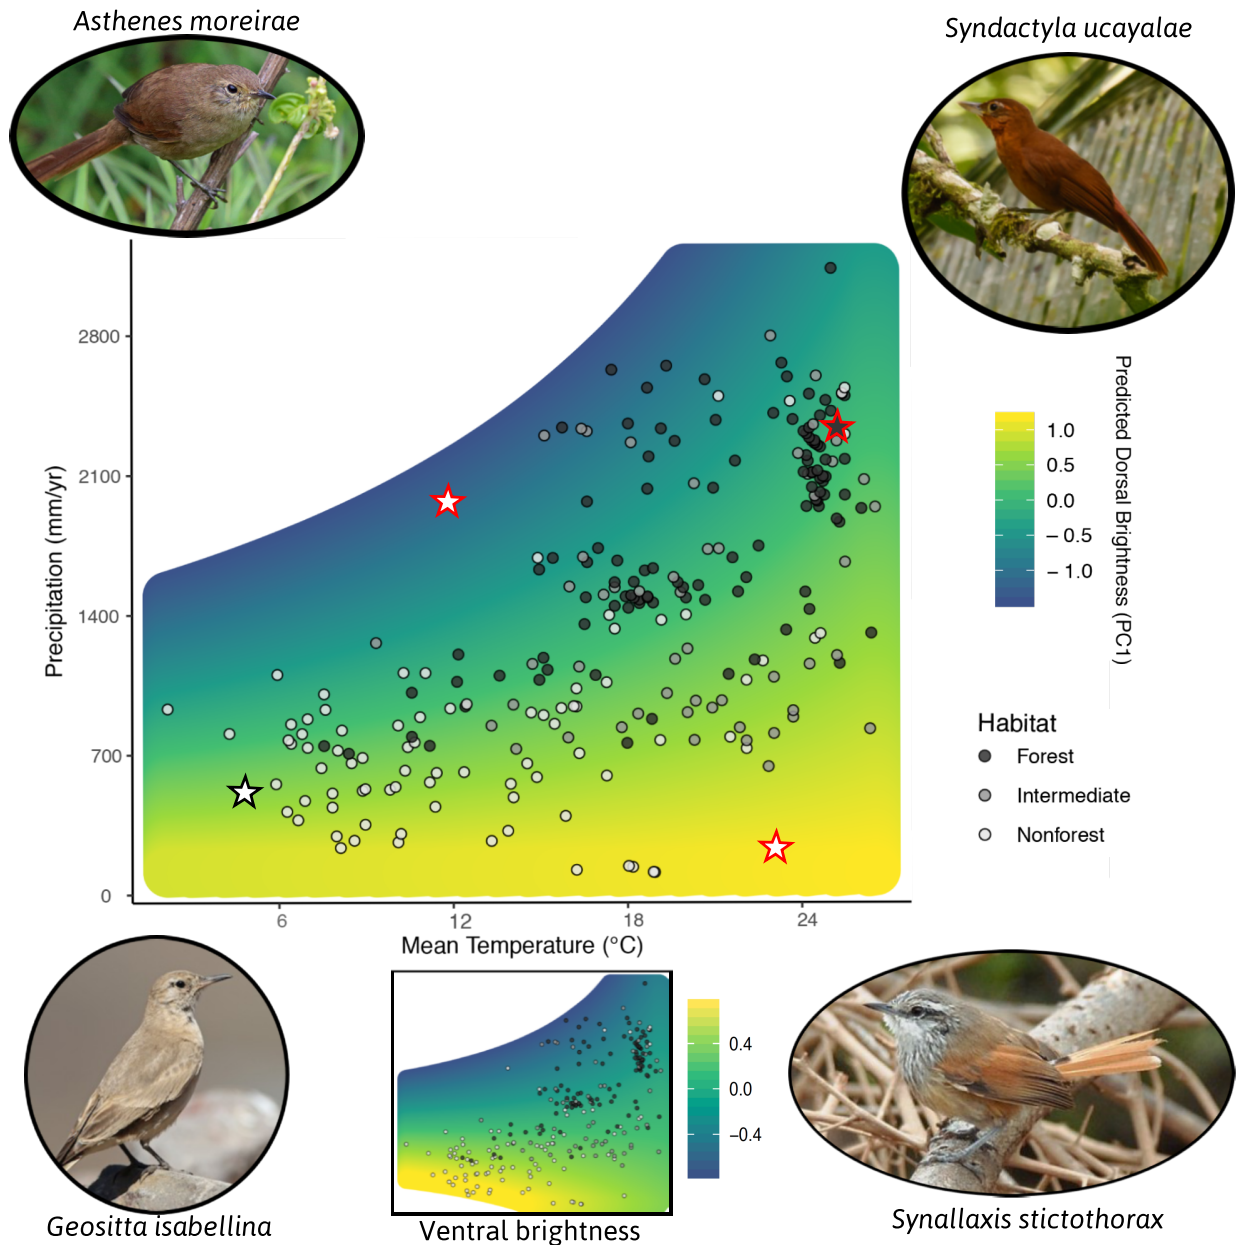

604

605 Figure 2. A complex interaction between precipitation and temperature predicts dorsal (main  
606 panel) and ventral (inset at bottom) brightness in the Furnariidae. The colors in the heatmap  
607 represent brightness as predicted by Model 1, which includes precipitation, temperature and their  
608 interaction as predictors. Stars represent the depicted species they are closest to. Photograph

609 authors and licenses: Top left: Nigel Voaden CC BY-SA 2.0. Top right: Rubens Matsushita ©.

610 Bottom right: Roger Ahlman ©. Bottom left: Luke Seltz ©.

611

612

613

614

615

616

617

618

619

620

621

622

623

624

625

626

627

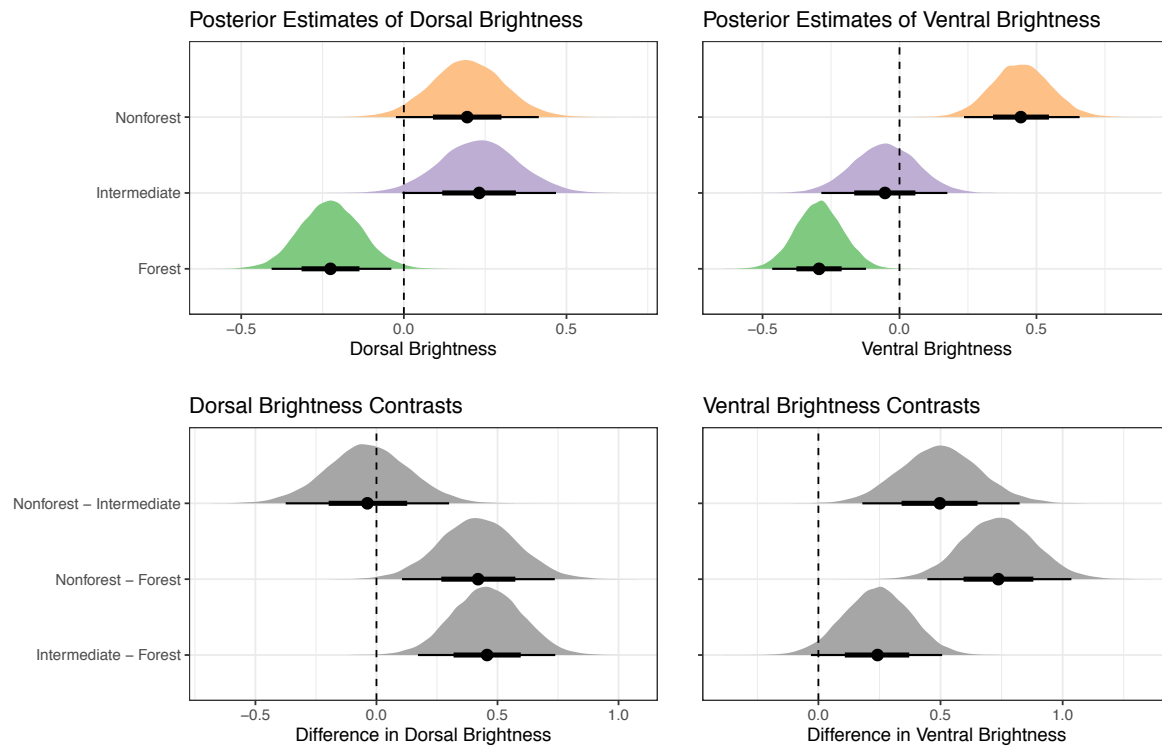

628

629 Figure 3. Differences in mean plumage brightness across light environments persist even after  
630 accounting for climatic variation. Top row: posterior distributions of the mean brightness value,  
631 conditioned on temperature, precipitation, and the phylogenetic correlation matrix, for the effects  
632 of climate. Bottom row: contrasts between the phylogenetic means of each habitat. If the contrast  
633 overlaps zero (dotted line), then there is no credible difference between the brightness of the two  
634 habitats. The black circle represents the mean and the horizontal bars the 66% (thick bar) and  
635 95% (thin bar) credible intervals of the distribution.

636

637

638

639

640

**Dorsal Model 1**

| <b>Population-Level Effects</b> | <b><math>\alpha</math> mean</b> | <b><math>\alpha</math> 95% CI</b> | <b><math>\beta</math> mean</b> | <b><math>\beta</math> 95% CI</b> |
|---------------------------------|---------------------------------|-----------------------------------|--------------------------------|----------------------------------|
| Intercept                       | -0.12                           | (-0.26, 0.02)                     | -                              | -                                |
| Temperature                     | -                               | -                                 | 0.44                           | (0.08, 0.28)                     |
| Precipitation                   | -                               | -                                 | -0.66                          | (-0.82, -0.51)                   |
| Temperature * Precipitation     |                                 |                                   | 0.21                           | (0.07, 0.35)                     |
| <b>Family Parameters</b>        | <b>Estimate</b>                 | <b>95% CI</b>                     |                                |                                  |
| Sigma                           | 0.83                            | (0.66, 0.95)                      | -                              | -                                |
| Alpha                           | 2.76                            | (1.93, 3.74)                      | -                              | -                                |
| <b>Group-Level Effects</b>      | <b>Estimate</b>                 | <b>95% CI</b>                     |                                |                                  |
| Phylogenetic Error (sd)         | 0.26                            | (0.01, 0.54)                      | -                              | -                                |

**Ventral Model 1**

| <b>Population-Level Effects</b> | <b><math>\alpha</math> mean</b> | <b><math>\alpha</math> 95% CI</b> | <b><math>\beta</math> mean</b> | <b><math>\beta</math> 95% CI</b> |
|---------------------------------|---------------------------------|-----------------------------------|--------------------------------|----------------------------------|
| Intercept                       | -0.08                           | (-0.23, 0.07)                     | -                              | -                                |
| Temperature                     | -                               | -                                 | 0.08                           | (-0.08, 0.23)                    |
| Precipitation                   |                                 |                                   | -0.38                          | (-0.53, -0.23)                   |
| Temperature * Precipitation     |                                 |                                   | 0.14                           | (0.00, 0.29)                     |
| <b>Family Parameters</b>        | <b>Estimate</b>                 | <b>95% CI</b>                     |                                |                                  |
| Sigma                           | 0.91                            | (0.81, 1.00)                      | -                              | -                                |
| Alpha                           | 3.21                            | (2.42, 4.04)                      | -                              | -                                |
| <b>Group-Level Effects</b>      | <b>Estimate</b>                 | <b>95% CI</b>                     |                                |                                  |
| Phylogenetic Error (sd)         | 0.14                            | (0.01, .036)                      |                                |                                  |

642

643 Table 1: Results from Dorsal Model and Ventral Model 1, where plumage brightness is predicted  
644 by temperature, precipitation, and their interaction.  $\alpha$  represents the intercept and  $\beta$  represents  
645 the regression coefficient conditioned on the phylogenetic correlation matrix. Population-Level  
646 Effects are the climatic parameters, Sigma is the residual error in the model, Alpha is the skew  
647 parameter in the skew-normal distribution, and Phylogenetic Error is the error in the model  
648 attributed to the phylogenetic correlation matrix.

649

650

651

652

653

654

655

656

657

658

659

660

661

662

663

664

665

## Dorsal Model 2

| <b>Population-Level Effects</b> | <b><math>\beta</math> mean</b> | <b><math>\beta</math> 95% CI</b> |
|---------------------------------|--------------------------------|----------------------------------|
| Precipitation                   | -0.48                          | (-0.64, -0.32)                   |
| Temperature                     | 0.35                           | (0.20, 0.50)                     |
| Forest Habitat                  | -0.23                          | (-0.41, -0.04)                   |
| Intermediate Habitat            | 0.23                           | (0.00, 0.47)                     |
| Nonforest Habitat               | 0.20                           | (-0.02, .041)                    |
| <b>Family Parameters</b>        | <b>Estimate</b>                | <b>95% CI</b>                    |
| Sigma                           | 0.81                           | (0.65, 0.94)                     |
| Alpha                           | 2.70                           | (1.86, 3.69)                     |
| <b>Group-Level Effects</b>      | <b>Estimate</b>                | <b>95% CI</b>                    |
| Phylogenetic Error (sd)         | 0.29                           | (0.02, 0.55)                     |

## Ventral Model 2

| <b>Population-Level Effects</b> | <b><math>\beta</math> mean</b> | <b><math>\beta</math> 95% CI</b> |
|---------------------------------|--------------------------------|----------------------------------|
| Precipitation                   | -0.19                          | (-0.34, -0.04)                   |
| Temperature                     | 0.10                           | (-0.05, 0.25)                    |
| Forest Habitat                  | -0.29                          | (-0.46, -0.12)                   |
| Intermediate Habitat            | -0.05                          | (-0.29, 0.17)                    |
| Nonforest Habitat               | 0.44                           | (0.24, 0.66)                     |
| <b>Family Parameters</b>        | <b>Estimate</b>                | <b>95% CI</b>                    |
| Sigma                           | 0.86                           | (0.76, 0.96)                     |
| Alpha                           | 3.09                           | (2.31, 3.93)                     |



| <b>Group-Level Effects</b> | <b>Estimate</b> | <b>95% CI</b> |
|----------------------------|-----------------|---------------|
| Phylogenetic Error (sd)    | 0.16            | (0.01, .039)  |

666

667 Table 2: Results from Dorsal Model and Ventral Model 2, where brightness is predicted by  
668 temperature, precipitation and habitat type.  $\beta$  represents the regression coefficient, conditioned  
669 on the phylogenetic correlation matrix. Population-Level Effects are climatic parameters and the  
670 brightness estimates for each habitat. Sigma is the residual error in the model, Alpha is the skew  
671 parameter in the skew-normal distribution, and Phylogenetic Error is the error in the model  
672 attributed to the phylogenetic correlation matrix.

673

674

675

676

677

678

679

680

681

682

683

684

685

686

687

688

| <b>Model</b>            |                     |                      |                        |
|-------------------------|---------------------|----------------------|------------------------|
| <b>Comparison</b>       | <b>WAIC (se)</b>    | <b>ELPD (se)</b>     | <b>ELPD Difference</b> |
| <b>Dorsal Null</b>      |                     |                      |                        |
| <b>Model</b>            | 693.7 (30.8)        | -348.8 (15.4)        | -34.4 (9.2)            |
| <b>Dorsal Model 1*</b>  | <b>629.3 (26.2)</b> | <b>-314.6 (13.1)</b> | <b>-2.2 (4.0)</b>      |
| <b>Dorsal Model 2*</b>  | <b>624.9 (27.5)</b> | <b>-312.4 (13.7)</b> | <b>0</b>               |
| <b>Ventral Null</b>     |                     |                      |                        |
| <b>Model</b>            | 676.8 (22.3)        | -338.4 (11.2)        | -23.8 (7.6)            |
| <b>Ventral Model 1</b>  | 648.4 (24.8)        | -324.2 (12.4)        | -9.5 (5.0)             |
| <b>Ventral Model 2*</b> | <b>629.3 (24.9)</b> | <b>-314.6 (12.4)</b> | <b>0</b>               |

689

690 Table 3: Model comparison for Dorsal Models and Ventral Models. The first column shows the  
691 Widely Applicable Information Criterion (WAIC) score with the standard error of the estimate in  
692 parentheses. The second model shows the Estimated Log-Predictive Density (ELPD), or the  
693 difference in the model's predictive accuracy, with standard error in parentheses. The third  
694 column provides the difference between the ELPD scores and the model with the highest  
695 predictive accuracy. In Model 1, brightness is predicted by temperature, precipitation and their  
696 interaction. In Model 2, brightness is predicted by temperature, precipitation and habitat type.  
697 For both venter and dorsum, Models 2 (in bold) have the highest predictive accuracy for the  
698 given data, and the null models have the lowest predictive accuracy. In the Dorsal models, the  
699 standard error of the ELPD difference for Models 1 and 2 overlaps, which means we cannot  
700 determine which of the two models has the highest ELPD score.

701

702

703
